# Supplementary material for: Production of 2-ketoisocaproate with Corynebacterium glutamicum strains devoid of plasmids and heterologous genes
Source: PubMed Central journal article supplement (PMC4353348; doi:10.1111/1751-7915.12237), 2014-12-09
Supplement: mbt20008-0351-sd1.pdf [file mbt20008-0351-sd1.pdf]

## Supporting Information for Vogt *et al.* 2014

**Table S1.** DNA oligonucleotides used in this study.

| Name                                                                                                  | DNA Sequence (5' - 3')                                            |
|-------------------------------------------------------------------------------------------------------|-------------------------------------------------------------------|
| <b>Oligonucleotides used for construction of plasmid pK19<i>mobsacB</i>-GTG-<i>ilvE</i></b>           |                                                                   |
| pilvE_SH0f_SbfI                                                                                       | AAAACCTGCAGGCCGCAATGACAGGCGCAACGTCG                               |
| pilvE_SH0r_XbaI                                                                                       | AAAATCTAGAGTGACCGTCACGTGCGATGAGGCCGTCCATGAG                       |
| pilvE_GTGf                                                                                            | GCAGGTGTACCTTAAAATCCGTGACGTCATTAGAG                               |
| pilvE_GTGr                                                                                            | CTCTAATGACGTCACGGATTTTAAGGTACACCTGC                               |
| <b>Oligonucleotides used for construction of plasmid pK19<i>mobsacB</i>-<math>\Delta</math>cg0018</b> |                                                                   |
| cg0018_sf                                                                                             | CTATCCGAGGTGGGTGAGTAGGGTGCCCGCGACGATAAGCGGACT<br>CACACCAG         |
| cg0018_sr                                                                                             | AAAAAAGCTTGCCCCAACATGCAATTTTCAGCGGCTGC                            |
| cg0018_ef                                                                                             | AAAACCTGCAGGCCTCTGAAACACAAACCCCTAGACACTGC                         |
| cg0018_er                                                                                             | GGCACCTACTCACCCACCTCGGATAG                                        |
| <b>Oligonucleotides used for construction of plasmid pK19<i>mobsacB</i>-<math>\Delta</math>cg1121</b> |                                                                   |
| cg1121_sf                                                                                             | AAAACCTGCAGGCGGACCAGCAGCTTGACCAGAGC                               |
| cg1121_sr                                                                                             | GCGGTTTTGGAAGTAGCTAAGCAGACGGTCGTCAATCAAGTTAAC<br>GCATCAAGGATC     |
| cg1121_ef                                                                                             | CGTCTGCTTAGCTACTTCCAAAACCGC                                       |
| cg1121_er                                                                                             | AAAAAAGCTTGAGAGCGTAAGGCCCTACTTCCTG                                |
| <b>Oligonucleotides used for construction of plasmid pK19<i>mobsacB</i>-<math>\Delta</math>cg1219</b> |                                                                   |
| cg1219_sf                                                                                             | AAAACCTGCAGGCGTTTTCTCCTGGGATGGCTTTCAACGC                          |
| cg1219_sr                                                                                             | GGTTTAGATTCTGATCATTGTTACGCCGAGCCCGAATAGCACTGC<br>AAGCATGAGGTTTTTC |
| cg1219_ef                                                                                             | CTCGGCGTAACAATGATCAGAATCTAAACC                                    |
| cg1219_er                                                                                             | AAAAAAGCTTCCAGTAGAATGCCACATCGTGGAACACGG                           |
| <b>Oligonucleotides used for construction of plasmid pK19<i>mobsacB</i>-<math>\Delta</math>cg1419</b> |                                                                   |
| cg1419_sf                                                                                             | AAAACCTGCAGGGGCTGCTGTATCTGCAACGGCAACC                             |
| cg1419_sr                                                                                             | GCCTTCTCCGAGGCAGCCTTTTCAACTTGAGTACTCATGTGCTCCC<br>TAACTG          |
| cg1419_ef                                                                                             | GAAAAGGCTGCCTCGGAGAAGGC                                           |
| cg1419_sr                                                                                             | AAAAAAGCTTCGCCCTTGCCGTTAACCCACAGGAAG                              |

**Oligonucleotides used for construction of plasmid pK19*mobsacB*- Δ*cg1658***

|           |                                                            |
|-----------|------------------------------------------------------------|
| cg1658_sf | CTTTTAGACCTCTCGGAGGTCGTGGTTCGTGGAGTGATCAGTTGT<br>GGTCACGAG |
| cg1658_sr | AAAAAAGCTTGCTGTTGATCTCTCGGGAATGCGTG                        |
| cg1658_ef | AAAACCTGCAGGGGTGGGCAAGCACGGTTCGAAGCGG                      |
| cg1658_er | CTTTTAGACCTCTCGGAGGTCGTGGTT                                |

**Oligonucleotides used for construction of plasmid pK19*mobsacB*-Δ*cg2557***

|           |                                                                |
|-----------|----------------------------------------------------------------|
| cg2557_sf | GTTAGCTGGAAACCGCGACGGATTCCTTCGCTGAACGGCCTTCTTC<br>TGTTTTGGACAC |
| cg2557_sr | AAAAAAGCTTCGGTGTCGTTGTAAGCGCGCAGGG                             |
| cg2557_ef | AAAACCTGCAGGGCGCTCCCAAGCGTGCAGGATTTG                           |
| cg2557_er | AAGGAATCCGTCGCGGTTTCCAGCTAAC                                   |

**Oligonucleotides used for construction of plasmid pK19*mobsacB*-Δ*cg2676***

|           |                                                                |
|-----------|----------------------------------------------------------------|
| cg2676_sf | GTAGTTGGCAGACATAACCACGGCGATAGGATTACTCATGAGTCT<br>TATGCCCTTTCCC |
| cg2676_sr | AAAAAAGCTTGGGCATCATCTTGATCCAGATCGTGTCC                         |
| cg2676_ef | AAAACCTGCAGGCGCGCTCTAGAAGCTCAATGACCTTC                         |
| cg2676_er | ATCGCCGTGGTTATGTCTGCCAACTAC                                    |

**Oligonucleotides used for construction of plasmid pK19*mobsacB*-Δ*cg3334***

|           |                                                       |
|-----------|-------------------------------------------------------|
| cg3334_sf | AAAACCTGCAGGTGTAATCTGCCGATTCTGTATTTGACGTGC            |
| cg3334_sr | GGGCTGCTACTTCAGTAGCGGGCGGGTGGTGTCTCATGGCTGCGAA<br>GCC |
| cg3334_ef | CGCCCGCTACTGAAGTAGCAGCCC                              |
| cg3334_er | AAAAAAGCTTGGTGTTTCCAATGCCCGTGTGGGTGCG                 |

**Oligonucleotides used for construction of plasmid pAN6-*leuA*\_B018-*cg1121***

|               |                                       |
|---------------|---------------------------------------|
| AvrII_cg1121f | GGGGCCTAGGCTGAACACTCCTGTACCTGTACAAATG |
| AvrII_cg1121r | GGGGCCTAGGGCGATTCTGAGAAGCCATTTTC      |

---

## Plasmid constructions

Overlap-extension PCR was applied for the construction of vector pK19*mobsacB*-GTG-*ilvE*: The upstream region of *ilvE* (approximately 500 bp) and *ilvE* along with its downstream region (approximately 1600 bp) were amplified via the oligonucleotide pairs pilvE\_SH0f\_SbfI/pilvE\_GTGr and pilvE\_GTGf/pilvE\_SH0r\_XbaI, respectively, from genomic DNA of *C. glutamicum* wild type. The amplified DNA fragments were fused in a PCR reaction via overlapping regions that introduce a mutation into *ilvE* leading to the start codon exchange ATG->GTG. This fusion product (approximately 2100 bp) was amplified using oligonucleotides pilvE\_SH0f\_SbfI and pilvE\_SH0r\_XbaI, digested with the restriction endonucleases *SbfI* and *XbaI* and finally ligated into the likewise digested vector pK19*mobsacB*.

To obtain plasmid pK19*mobsacB*- $\Delta$ cg1121, the regions upstream and downstream (each 500 bp, approximately) of the gene coding for Cg1121 were amplified via the oligonucleotide pairs cg1121\_sf/cg1121\_sr and cg1121\_ef/cg1121\_er, respectively, from genomic DNA of *C. glutamicum* wild type. The amplified DNA fragments were fused in an overlap-extension PCR resulting in a product (approximately 1000 bp) that was amplified with oligonucleotides cg1121\_sf and cg1121\_er. This PCR fragment was digested with the restriction enzymes *SbfI* and *HindIII* and ligated into the likewise digested vector pK19*mobsacB*.

The vectors for deletion of the genes cg0018, cg 1219, cg 1419, cg1658, cg2557, cg2676, and cg3334 (Table 1) were constructed analogously to plasmid pK19*mobsacB*- $\Delta$ cg1121 via overlap-extension PCR, using the respective primers (Table S1). Amplified fused PCR products were digested with the restriction enzymes *SbfI* and *HindIII* and ligated into the likewise digested vector pK19*mobsacB*.

To obtain vector pK19*mobsacB*-cg1121, the gene coding for Cg1121 (861 bp) along with its upstream and downstream regions (each 500 bp, approximately) was amplified via the oligonucleotide pairs cg1121\_sf and cg1121\_er from genomic DNA of *C. glutamicum* wild type. The resulting PCR product (approximately 1900 bp) was digested with the restriction enzymes *SbfI* and *HindIII* and ligated into the likewise digested vector pK19*mobsacB*.

The plasmid pAN6-*leuA*\_B018-cg1121 was constructed by amplifying the coding sequence for cg1121 (861 bp) along with its upstream (94 bp) and downstream (305 bp) regions from genomic DNA of *C. glutamicum* wild type via the oligonucleotides AvrII\_cg1121f and AvrII\_cg1121r. The PCR fragment was digested with the restriction enzyme *AvrII* and ligated into the likewise digested vector pAN6-*leuA*\_B018.
